# Supplementary material for: Immune translational control by CPEB4 regulates intestinal inflammation resolution and colorectal cancer development
Source: PubMed Central journal article supplement — iScience. 2022 Jan 22;25(2):103790. doi: 10.1016/j.isci.2022.103790 (PMC8859527; doi:10.1016/j.isci.2022.103790), 2022-01-22
Supplement: mmc1.pdf [file mmc1.pdf]

**Supplemental information**

**Immune translational control by CPEB4  
regulates intestinal inflammation resolution  
and colorectal cancer development**

**Annarita Sibilio, Clara Suñer, Marcos Fernández-Alfara, Judit Martín, Antonio Berenguer, Alexandre Calon, Veronica Chanes, Alba Millanes-Romero, Gonzalo Fernández-Miranda, Eduard Batlle, Mercedes Fernández, and Raúl Méndez**

Figure S1. Characterization of gut and systemic CPEB4 depletion, related to Figure 1

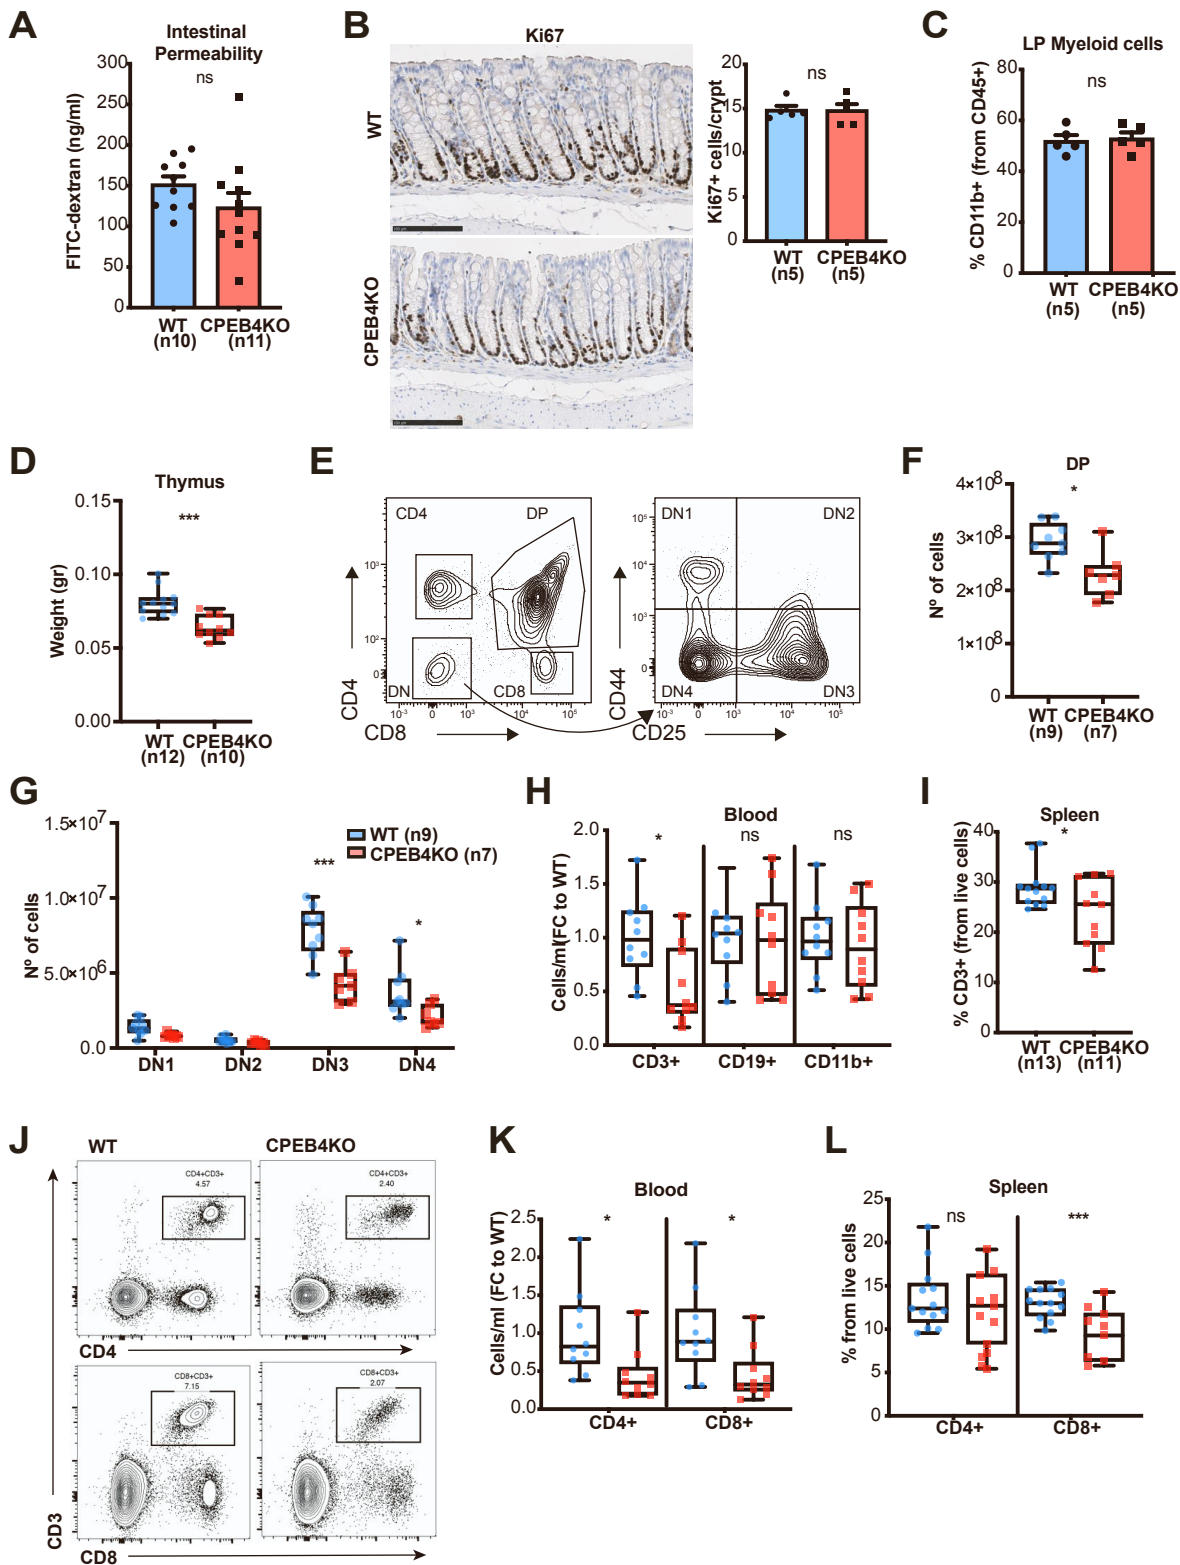

Figure S2. Characterization of CPEB4-depleted mice during DSS-colitis resolution, related to Figure 2

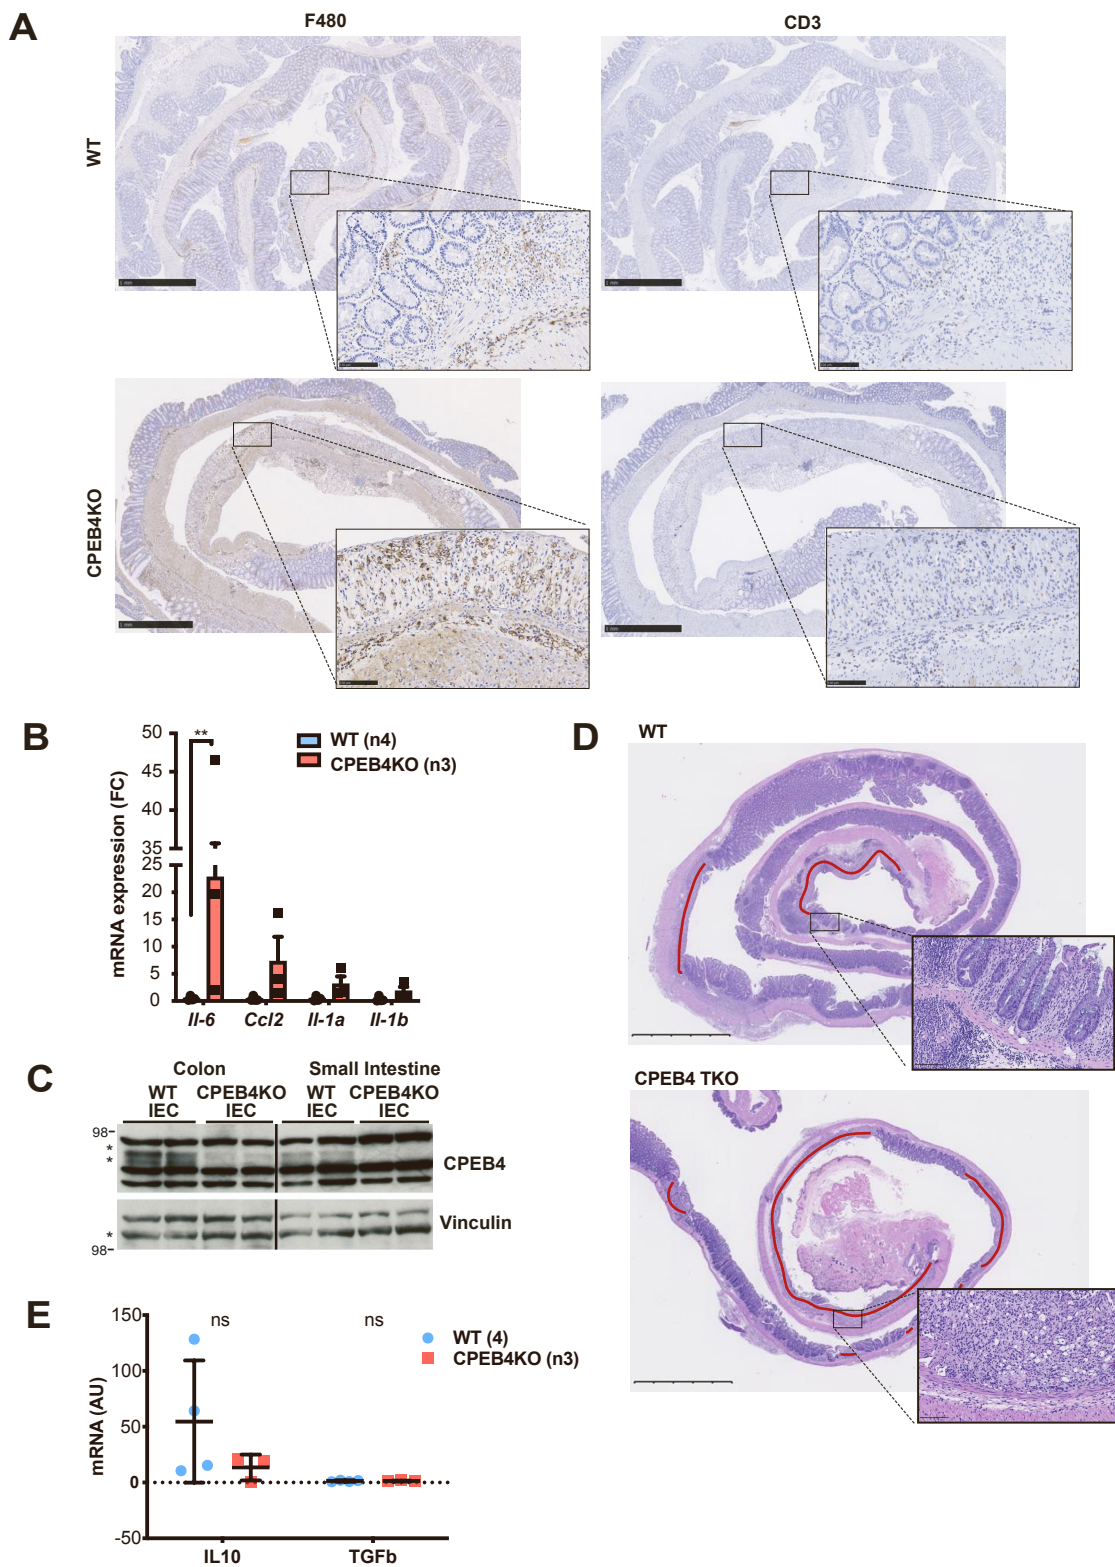

Figure S3. Characterizaion of IL-22 signaling in WT and CPEB4KO mice, related to Figure 4

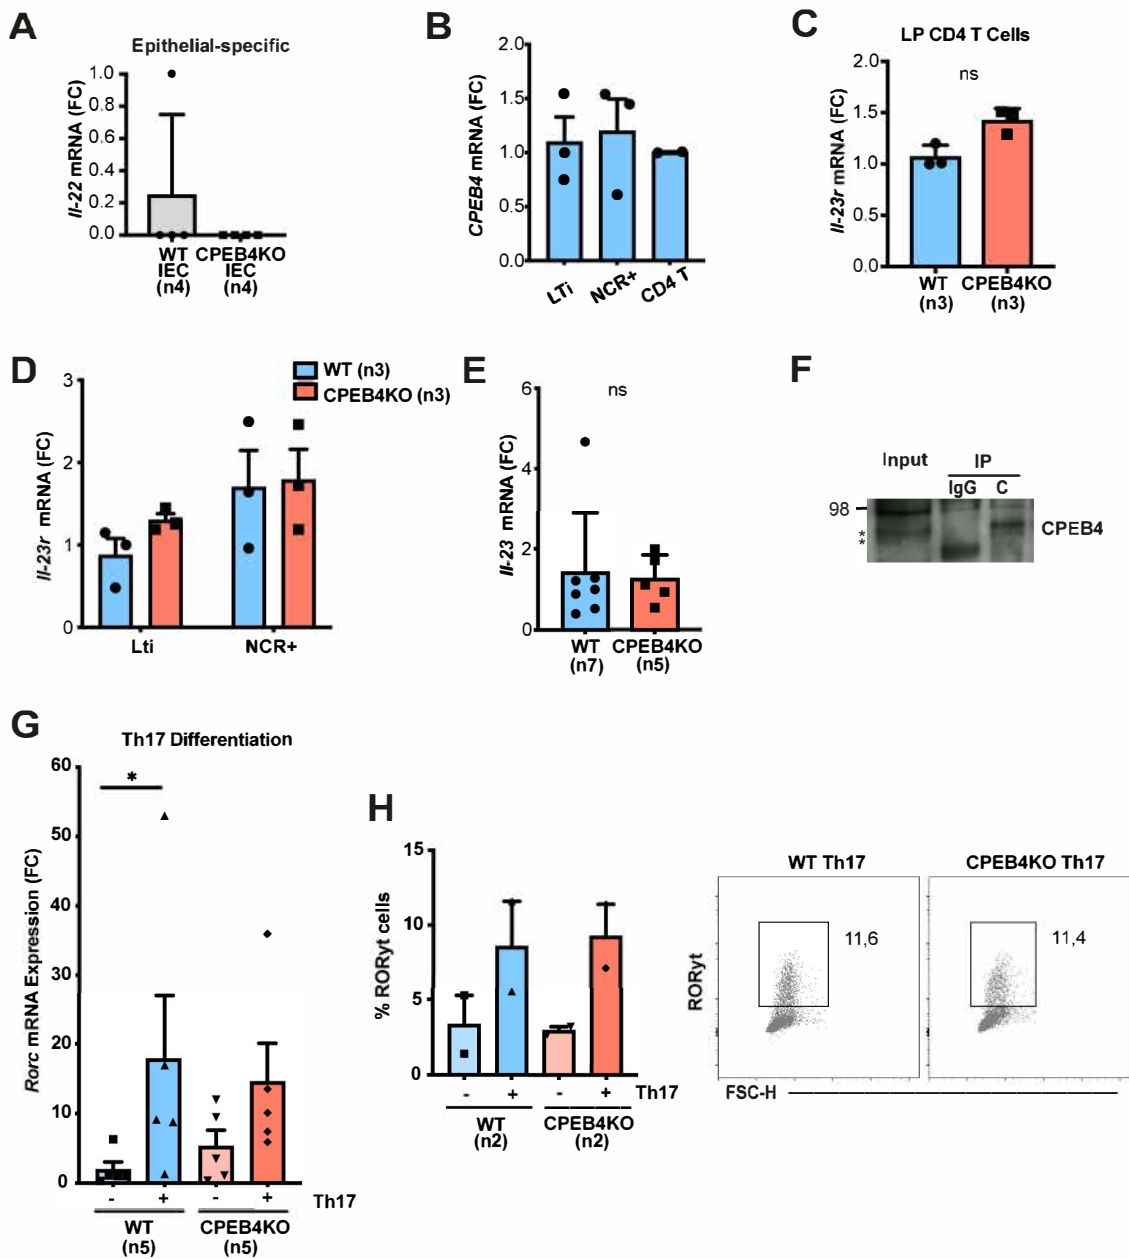

Figure S4. Characterization of WT and CPEB4KO AOM/DSS tumors, related to Figure 5

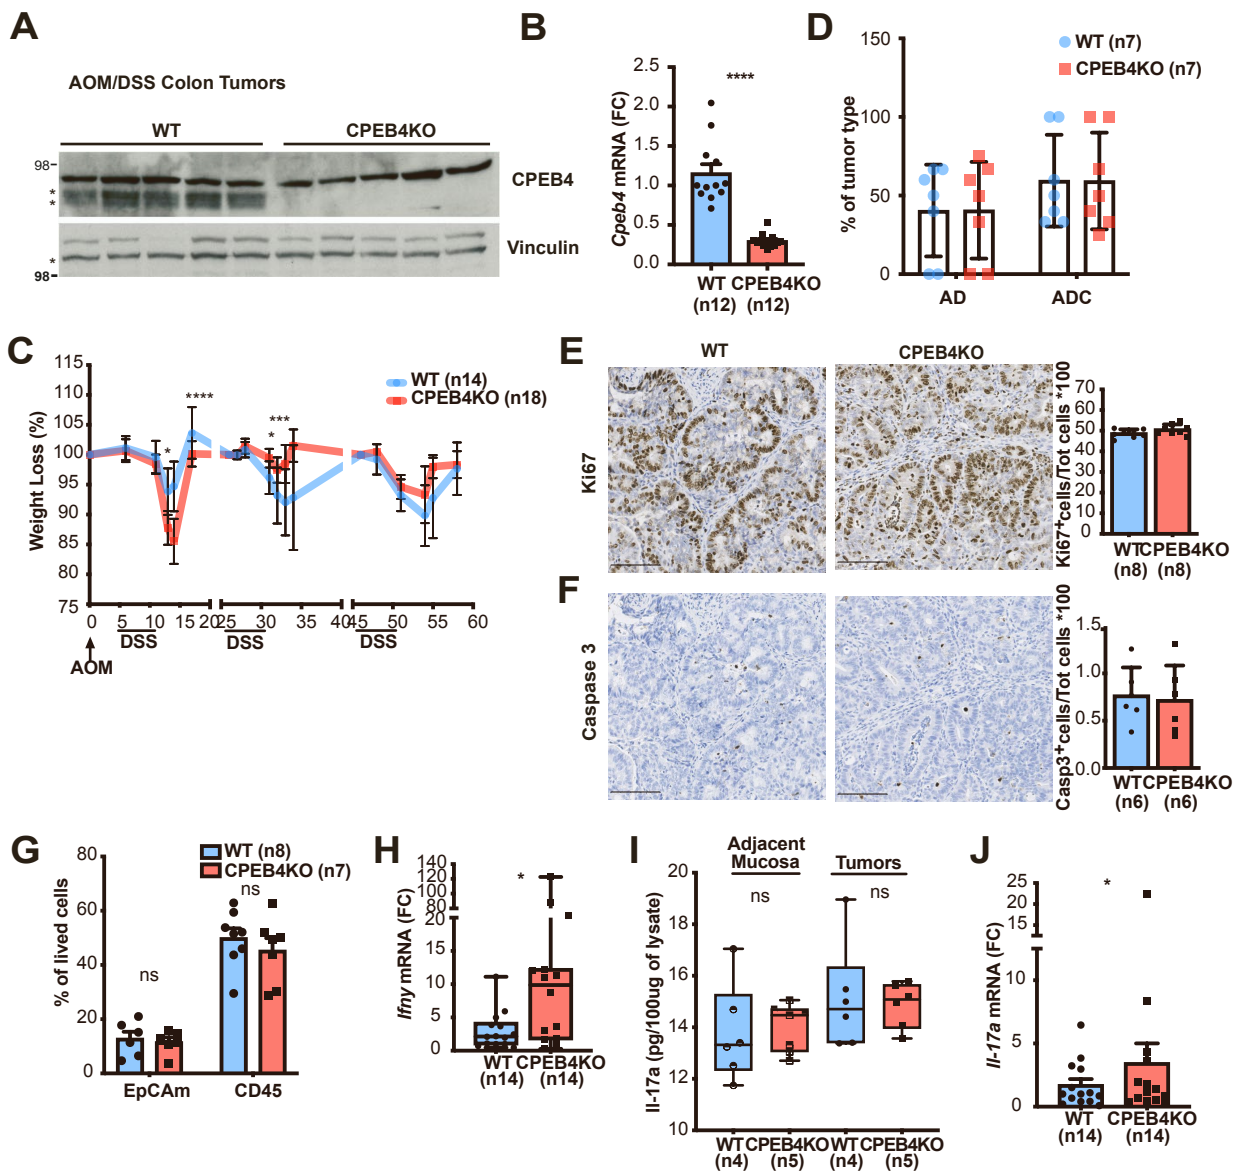

Figure S5. CPEB4 accumulates in the immune cell population of AOM/DSS tumors, related to Figure 6

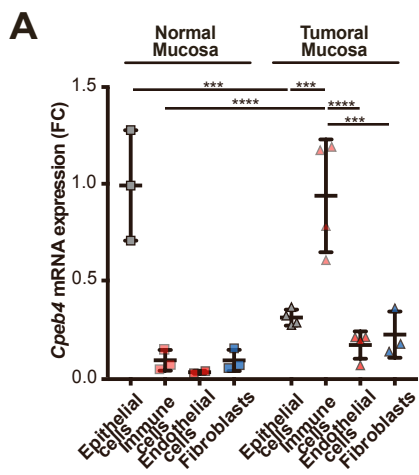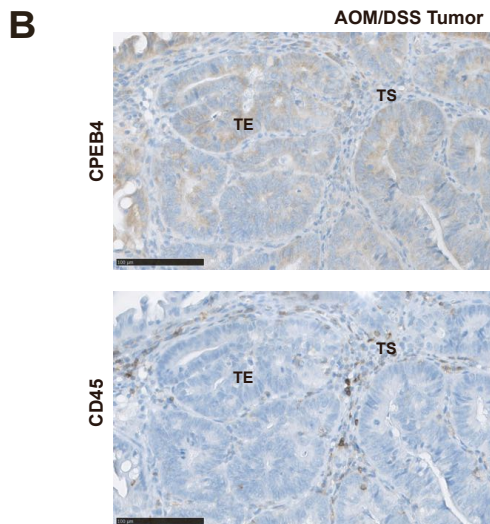

## SUPPLEMENTAL INFORMATION

### SUPPLEMENTAL FIGURE LEGENDS

#### **Figure S1. Characterization of gut and systemic CPEB4 depletion, related to Figure 1.**

(A) Intestinal permeability in WT (n=10) and CPEB4KO (n=11) mice was measured by determining the concentration of FITC-dextran in blood serum. Mean  $\pm$  SEM,  $P=0,0986$ . (B) Representative stainings and relative quantification of Ki67 and IHC from WT and CPEB4KO untreated colons. (C) WT and CPEB4KO lamina propria (LP) myeloid cells (CD11b<sup>+</sup>) were analysed from CD45<sup>+</sup> cells by flow cytometry analysis. (D) Thymus weight of WT (n=12) and CPEB4KO (n=10) mice. Mean  $\pm$  SEM. \*\*\* $P=0.0002$ . (E) Representative plots of thymus populations analysis by FACS. (F,G) Number of double positive (DP) (F) and double negative (DN) (G) populations of WT (n=9) and CPEB4KO (n=7) thymus. Mean  $\pm$  SEM. (F) \* $P=0.0115$  (Mann-Whitney); (G)\*\*\* $P<0.0001$ , \* $P=0.0111$ . (H) Blood immune phenotyping of WT and CPEB4KO mice (n=10/genotype) by FACS analysis. The data are shown as FC to WT of cells/ml. CD3, \* $P=0.0116$ ; (unpaired *t*-test). (I) Spleen samples from unchallenged WT (n=13) and CPEB4KO (n=11) mice were analyzed by FACS for CD3<sup>+</sup>. Data are shown as percentages from live cells (mean  $\pm$  SEM). \* $P=0.0267$ . (J) Representative plots of blood analysis by FACS. (K) CD4<sup>+</sup> and CD8<sup>+</sup> cells/ml and representative plots of cytometry analysis of WT and CPEB4KO blood samples. The stainings are indicated. CD4, \* $P=0.0151$ ; CD8, \* $P=0.0166$  (Unpaired *t*-test). (L), Percentage of CD4<sup>+</sup> and CD8<sup>+</sup> from spleen of WT and CPEB4KO mice. \*\*\* $P=0.0007$  (Unpaired *t*-test). Data are pooled of two (A) and three (C,D,F,G,H,I,K,L) biologically independent experiments.

#### **Figure S2: Characterization of CPEB4-depleted mice during DSS-colitis resolution, related to Figure 2.**

(A) Representative stainings of F480 and CD3 IHC from WT and CPEB4KO DSS-treated colons at day 10. Scale bars, 1 mm; larger magnification 100 $\mu$ m. (B) Relative mRNA expression levels of *Il-6*, *Ccl2*, *Il-1a* and *Il-1b* in colon of DSS-treated WT and CPEB4KO mice at day 10 were determined by qPCR. Expression levels were measured as fold change (FC) of treated WT mice for each gene. Data are mean  $\pm$  SEM; \*\* $P=0.0041$  (two-way ANOVA test, multiple comparisons). (C) CPEB4 protein expression in colon and small intestine lysates after 5 days of tamoxifen treatment in WT and CPEB4 intestine-specific KO mice. Vinculin was used as loading control. \* Shows specific bands. (D) Representative H&E-stained colon sections from DSS-treated WT and CPEB4 TKO mice, analyzed at day 11. The regenerating region is highlighted with a red line. Scale bars, 2.5 mm. Larger magnification 100 $\mu$ m.

#### **Figure S3: Characterization of IL-22 signaling in WT and CPEB4KO mice, related to Figure 4.**

(A) *Il-22* mRNA expression in colon extracts of epithelial specific WT and CPEB4KO mice (n=4/genotype). Data are normalized by *Gapdh*. (B) *Cpeb4* mRNA expression in LT<sub>i</sub> and NCR<sup>+</sup> (ILC3) and CD4<sup>+</sup> T cells from lamina propria of WT mice. (C) *Il-23r* mRNA expression in CD4 T cells (n=3) and (D) Lt<sub>i</sub> and NCR<sup>+</sup> ILC3 cells (n=3) from lamina propria (means  $\pm$  SEM). (E) *Il-23* mRNA expression in colon extracts of WT (n=7) and CPEB4KO (n=5) mice. (F) Representative CPEB4 western blot of RNA immunoprecipitation experiment in Th17 differentiated CD4 cells. (G,H) *Rorc* mRNA and ROR $\gamma$ t protein expression in WT and CPEB4KO CD4 T cells stimulated or not to induce Th17 differentiation. \* $P=0,0159$  (Mann-Whitney test between WT and WT Th17).

#### **Figure S4: Characterization of WT and CPEB4KO AOM/DSS tumors, related to Figure 5.**

(A,B) CPEB4 protein and mRNA expression in AOM/DSS colon tumors from WT and CPEB4KO mice. \* Shows specific bands; \*\*\* $P=0.0002$  (Mann-Whitney test). (C) Percentage

of body weight loss after AOM/DSS treatment in WT (n=14) and CPEB4KO (n=18) mice. \* $P=0.0136$ , \*\*\*\* $P<0.0001$ , \* $P=0.0182$ , \*\*\* $P=0.0002$  (two-way ANOVA test, multiple comparisons). (D) Percentage of tumor types, polypoid and flat adenomas (AD) and adenocarcinomas (ADC). The presence of one type of tumor was set as 100%. (E,F) Representative images and related quantifications of colon tumors immunostained for Ki67 (WT, n=8; CPEB4KO, n=8) and Caspase 3 (WT, n=6; CPEB4KO, n=6) at end point. Scale bars, 100  $\mu\text{m}$ . (G) Epcam<sup>+</sup> and CD45<sup>+</sup> populations of colon tumors from WT and CPEB4KO mice were gated from lived cells. (H) *Ifny* mRNA levels, relative to *Gapdh*, in total colon tumor extracts from WT and CPEB4KO mice (n=14/genotype). \* $P=0.0163$  (Mann-Whitney test). (I) ELISA of il-17a in adjacent mucosa and AOM-DSS tumors of WT (n=6) and CPEB4KO (n=6) mice. (J) Relative *il-17a* mRNA levels in WT (n=14) and CPEB4KO (n=14) tumors analysed by RT-qPCR. \* $P=0,5$  (unpaired *t*-test).

**Figure S5. CPEB4 accumulates in the immune cell population of AOM/DSS tumors, related to Figure 6.** (A) Relative mRNA expression levels (fold change, FC) of *Cpeb4* in normal and tumoral mucosa of untreated and AOM/DSS-treated WT mice, respectively, were determined by RT-qPCR. Data are means  $\pm$  SD. \*\*\* $P=<0.005$ ; \*\*\*\* $P<0.0001$  (two-way ANOVA test, multiple comparisons). (B) Representative stainings of CPEB4 and CD45 in AOM/DSS-induced tumors from WT mice. Scale bars, 100  $\mu\text{m}$ .



**Table S1 Primers used for Real Time qPCR\_related to STAR Methods**

| Gene               | Forward                 | Reverse                  |
|--------------------|-------------------------|--------------------------|
| <i>mCpeb4</i>      | CCAGAATGGGGAGAGAGTGG    | CGGAAACTAGCTGTGATCTCATCT |
| <i>mll-17a</i>     | GCTCCAGAAGGCCCTCAGA     | CTTCCCTCCGCATTGACA       |
| <i>mll-17f</i>     | TCCCCTGGAGGATAAACTG     | GGGTCTCGAGTGATGTTGT      |
| <i>mll-1a</i>      | GAGAGCCGGGTGACAGTATC    | TGACAACTTCTGCCTGACG      |
| <i>mll-1b</i>      | GGGCCTCAAAGGAAAGAATC    | TACCAGTTGGGAACTCTGC      |
| <i>mll-6</i>       | AGTTGCCTTCTTGGGACTGA    | CAGAATTGCCATTGCACAAC     |
| <i>mll-10</i>      | GGTTGCCAAGCCTTATCGGA    | GAGAAATCGATGACAGCGCC     |
| <i>mll-22</i>      | TCCGAGGAGTCAGTGCTAAA    | AGAACGTCTTCCAGGGTGAA     |
| <i>mTNFa</i>       | CTATGGCCCAGACCCTCACACTC | GCTGGCACCCTAGTTGGTTGTCTT |
| <i>mIFNy</i>       | AACTGGCAAAGGATGGTGAC    | TTGCTGATGGCCTGATTGTC     |
| <i>mCcl2</i>       | TTTTGTACCAAGCTCAAGAGA   | ATTAAGGCATCACAGTCCGAGT   |
| <i>mll-23R</i>     | AGAGACACTGATTTGTGGGAAAG | GTTCCAGGTGCATGTCATGTT    |
| <i>mSaa1/2</i>     | AGTGGCAAAGACCCCAATTA    | GGCAGTCCAGGAGGTCTGTA     |
| <i>mAngiogenin</i> | TTGGCTTGGCATCATAGT      | CCAGCTTTGGAATCACTG       |
| 4                  |                         |                          |
| <i>mll-22ra2</i>   | TATTTTGCCTGGCAAGCAG     | CCCATTGGCTCTGTCCATAC     |
| <i>mGapdh</i>      | CTTCACCACCATGGAGGAGGC   | GGCATGGACTGTGGTCATGAG    |
| <i>mHPRT</i>       | TATGGCGACCCGCAGCCCT     | CATCTCGAGCAAGACGTTTCAG   |
| <i>mTBP</i>        | AGAACAATCCAGACTAGCAGCA  | GGGAACTTCACATCACAGCTC    |

| Table S2_ GEO Datasets used_related to STAR Methods |  |  |  |  |
|-----------------------------------------------------|--|--|--|--|
|                                                     |  |  |  |  |
| Colorectal cancer datasets:                         |  |  |  |  |
|                                                     |  |  |  |  |
| GSE33113                                            |  |  |  |  |
| GSE14333                                            |  |  |  |  |
| GSE39582                                            |  |  |  |  |
| GSE38832                                            |  |  |  |  |
| GSE44076                                            |  |  |  |  |
| GSE39395                                            |  |  |  |  |
| GSE39396                                            |  |  |  |  |
| GSE35602                                            |  |  |  |  |
|                                                     |  |  |  |  |
| Adult inflammatory bowel disease datasets:          |  |  |  |  |
|                                                     |  |  |  |  |
| GSE13367                                            |  |  |  |  |
| GSE59071                                            |  |  |  |  |
| GSE9452                                             |  |  |  |  |
| GSE16879                                            |  |  |  |  |
|                                                     |  |  |  |  |
| Pediatric inflammatory bowel disease dataset:       |  |  |  |  |
|                                                     |  |  |  |  |
| GSE10616                                            |  |  |  |  |
